# Supplementary material for: A comparative study for oil-absorbing performance of octadecyltrichlorosilane treated Calotropis gigantea fiber and kapok fiber
Source: Springer Nature journal article supplement (doi:10.1007/s10570-016-1155-z), 2016-12-10
Supplement: MOESM1 [file 11917014]

**Supporting Information**

for

**A comparative study for oil-absorbing performance of octadecyltrichlorosilane treated** **Calotropis gigantea fiber and kapok fiber**

Yian Zheng **·** Enjuan Cao **·** Lixin Tu **·** Aiqin Wang **·** Huimin Hu

Y. Zheng (🖂) **·** E. Cao **·** L. Tu

Gansu Key Laboratory for Environmental Pollution Prediction and Control, College of Earth and Environmental Sciences, Lanzhou University, Lanzhou 730000, China

e-mail: zhengya@lzu.edu.cn

Y. Zheng (🖂)

Zhongwei High-tech Institute of Lanzhou University, Zhongwei, 755000, China

A. Wang

Center of Eco-materials and Green Chemistry, Lanzhou Institute of Chemical Physics, Chinese Academy of Sciences, Lanzhou, 730000, China. Tel.: +86 931 4968118; Fax: +86 931 8277088.

H. Hu

Shanghai Magic Tree Biotechnology Co., Ltd., Shanghai 201203 , China


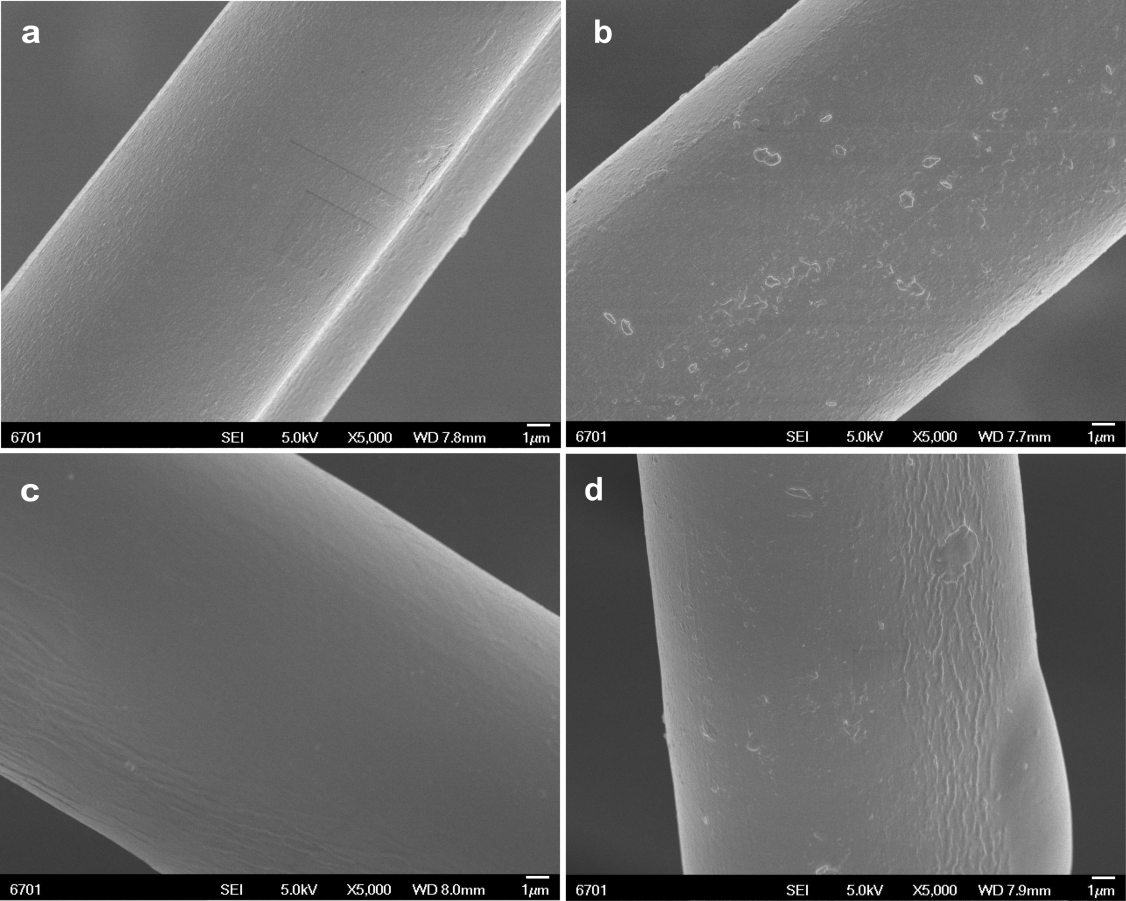


**Fig. S1** SEM images of CGF (a), OTS-CGF (b), KF (c) and OTS-KF (d). The scale bar is 1 μm


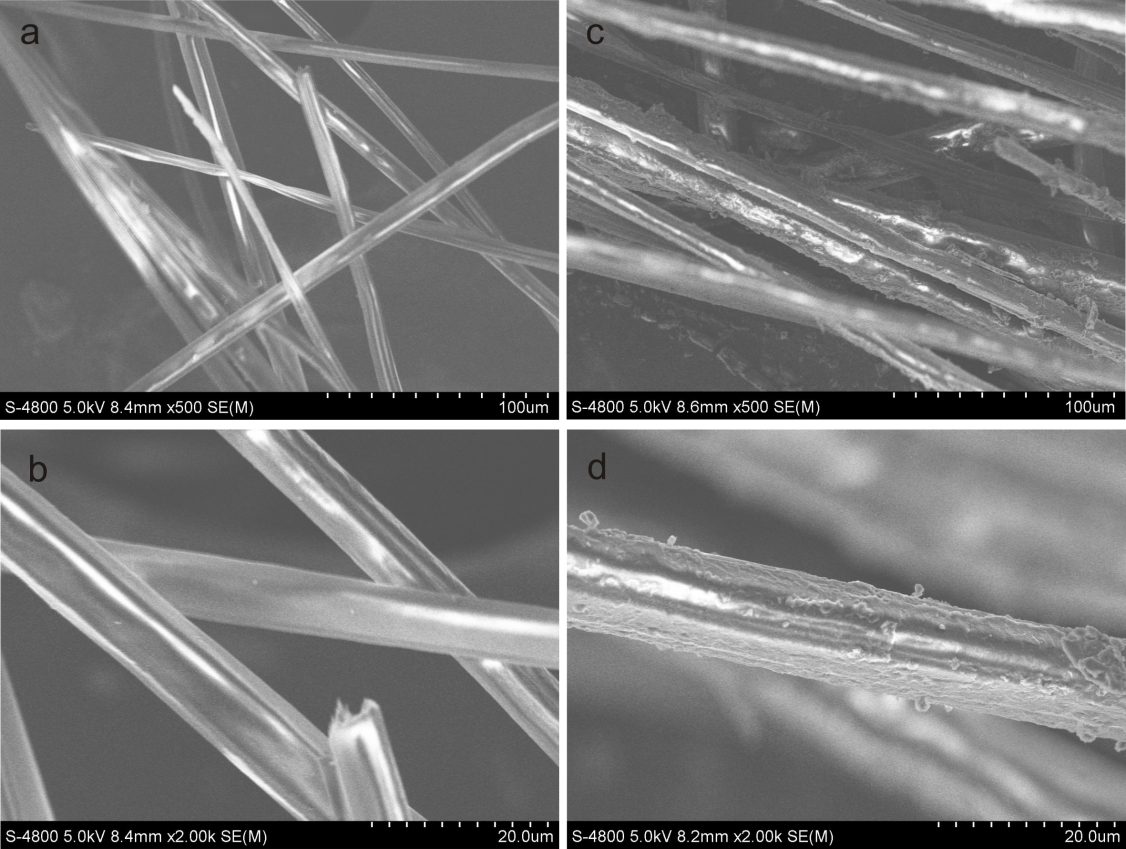


**Fig. S2** SEM images of CGF (a,b) and OTS-CGF (c,d) at lower magnification


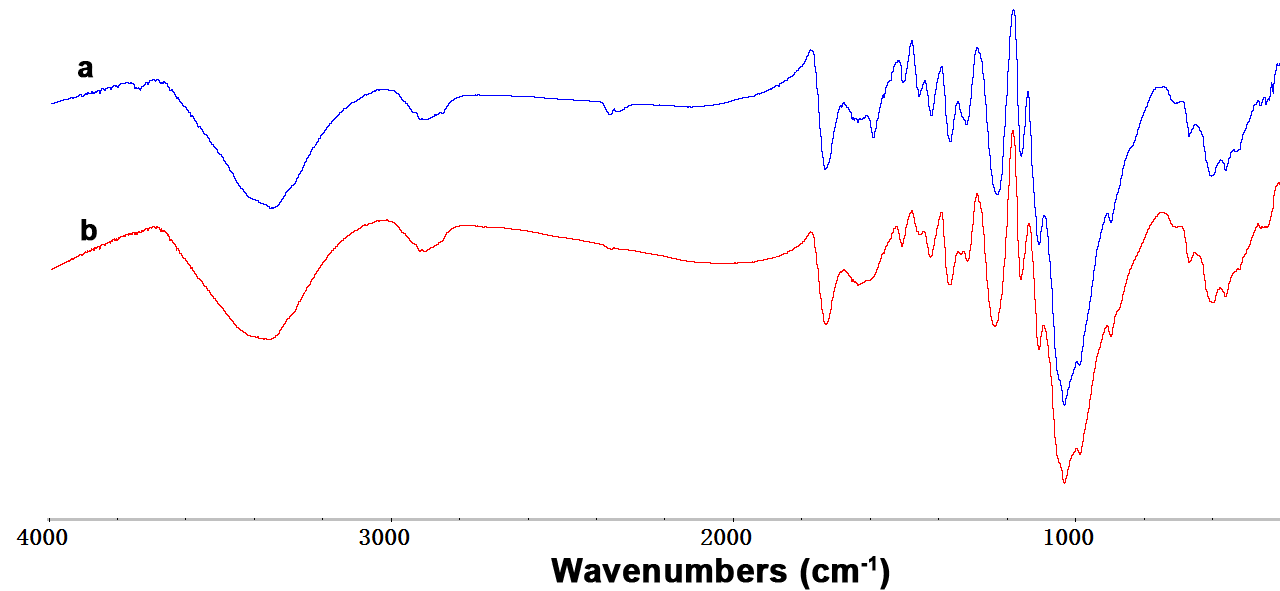


**Fig. S3** FTIR spectra of (a) KF and (b) CGF


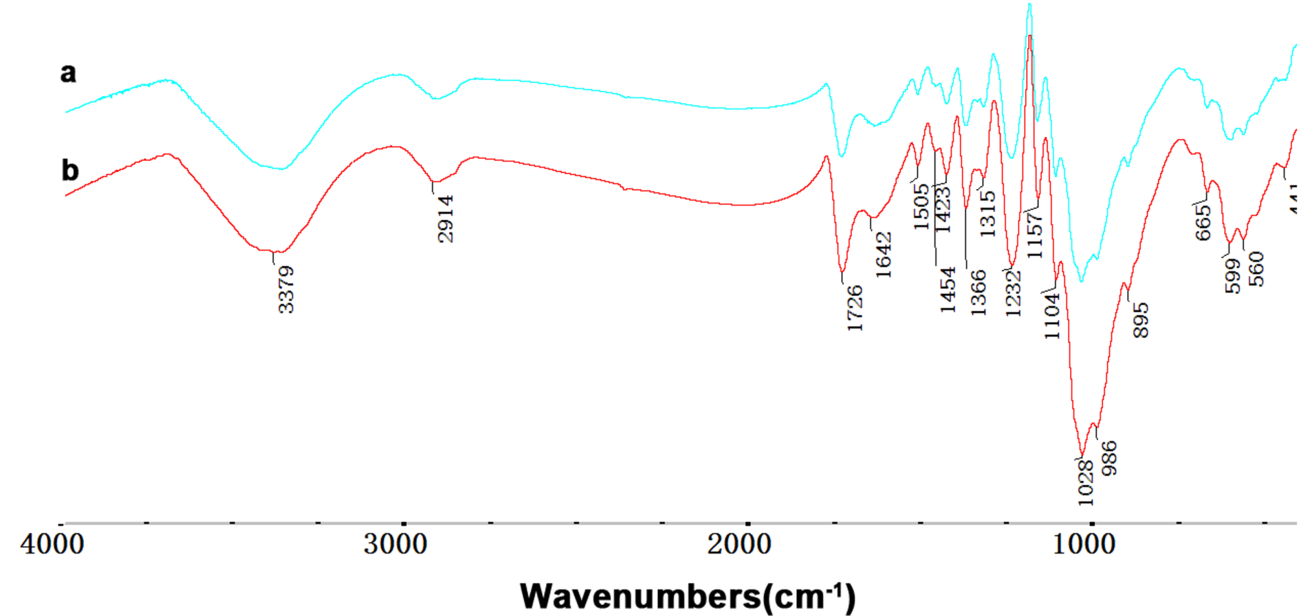


**Fig. S4** FTIR spectra of (a) CGF and (b) OTS-CGF

**Fig. S5** Thecontact angles against water for original CGF and KF


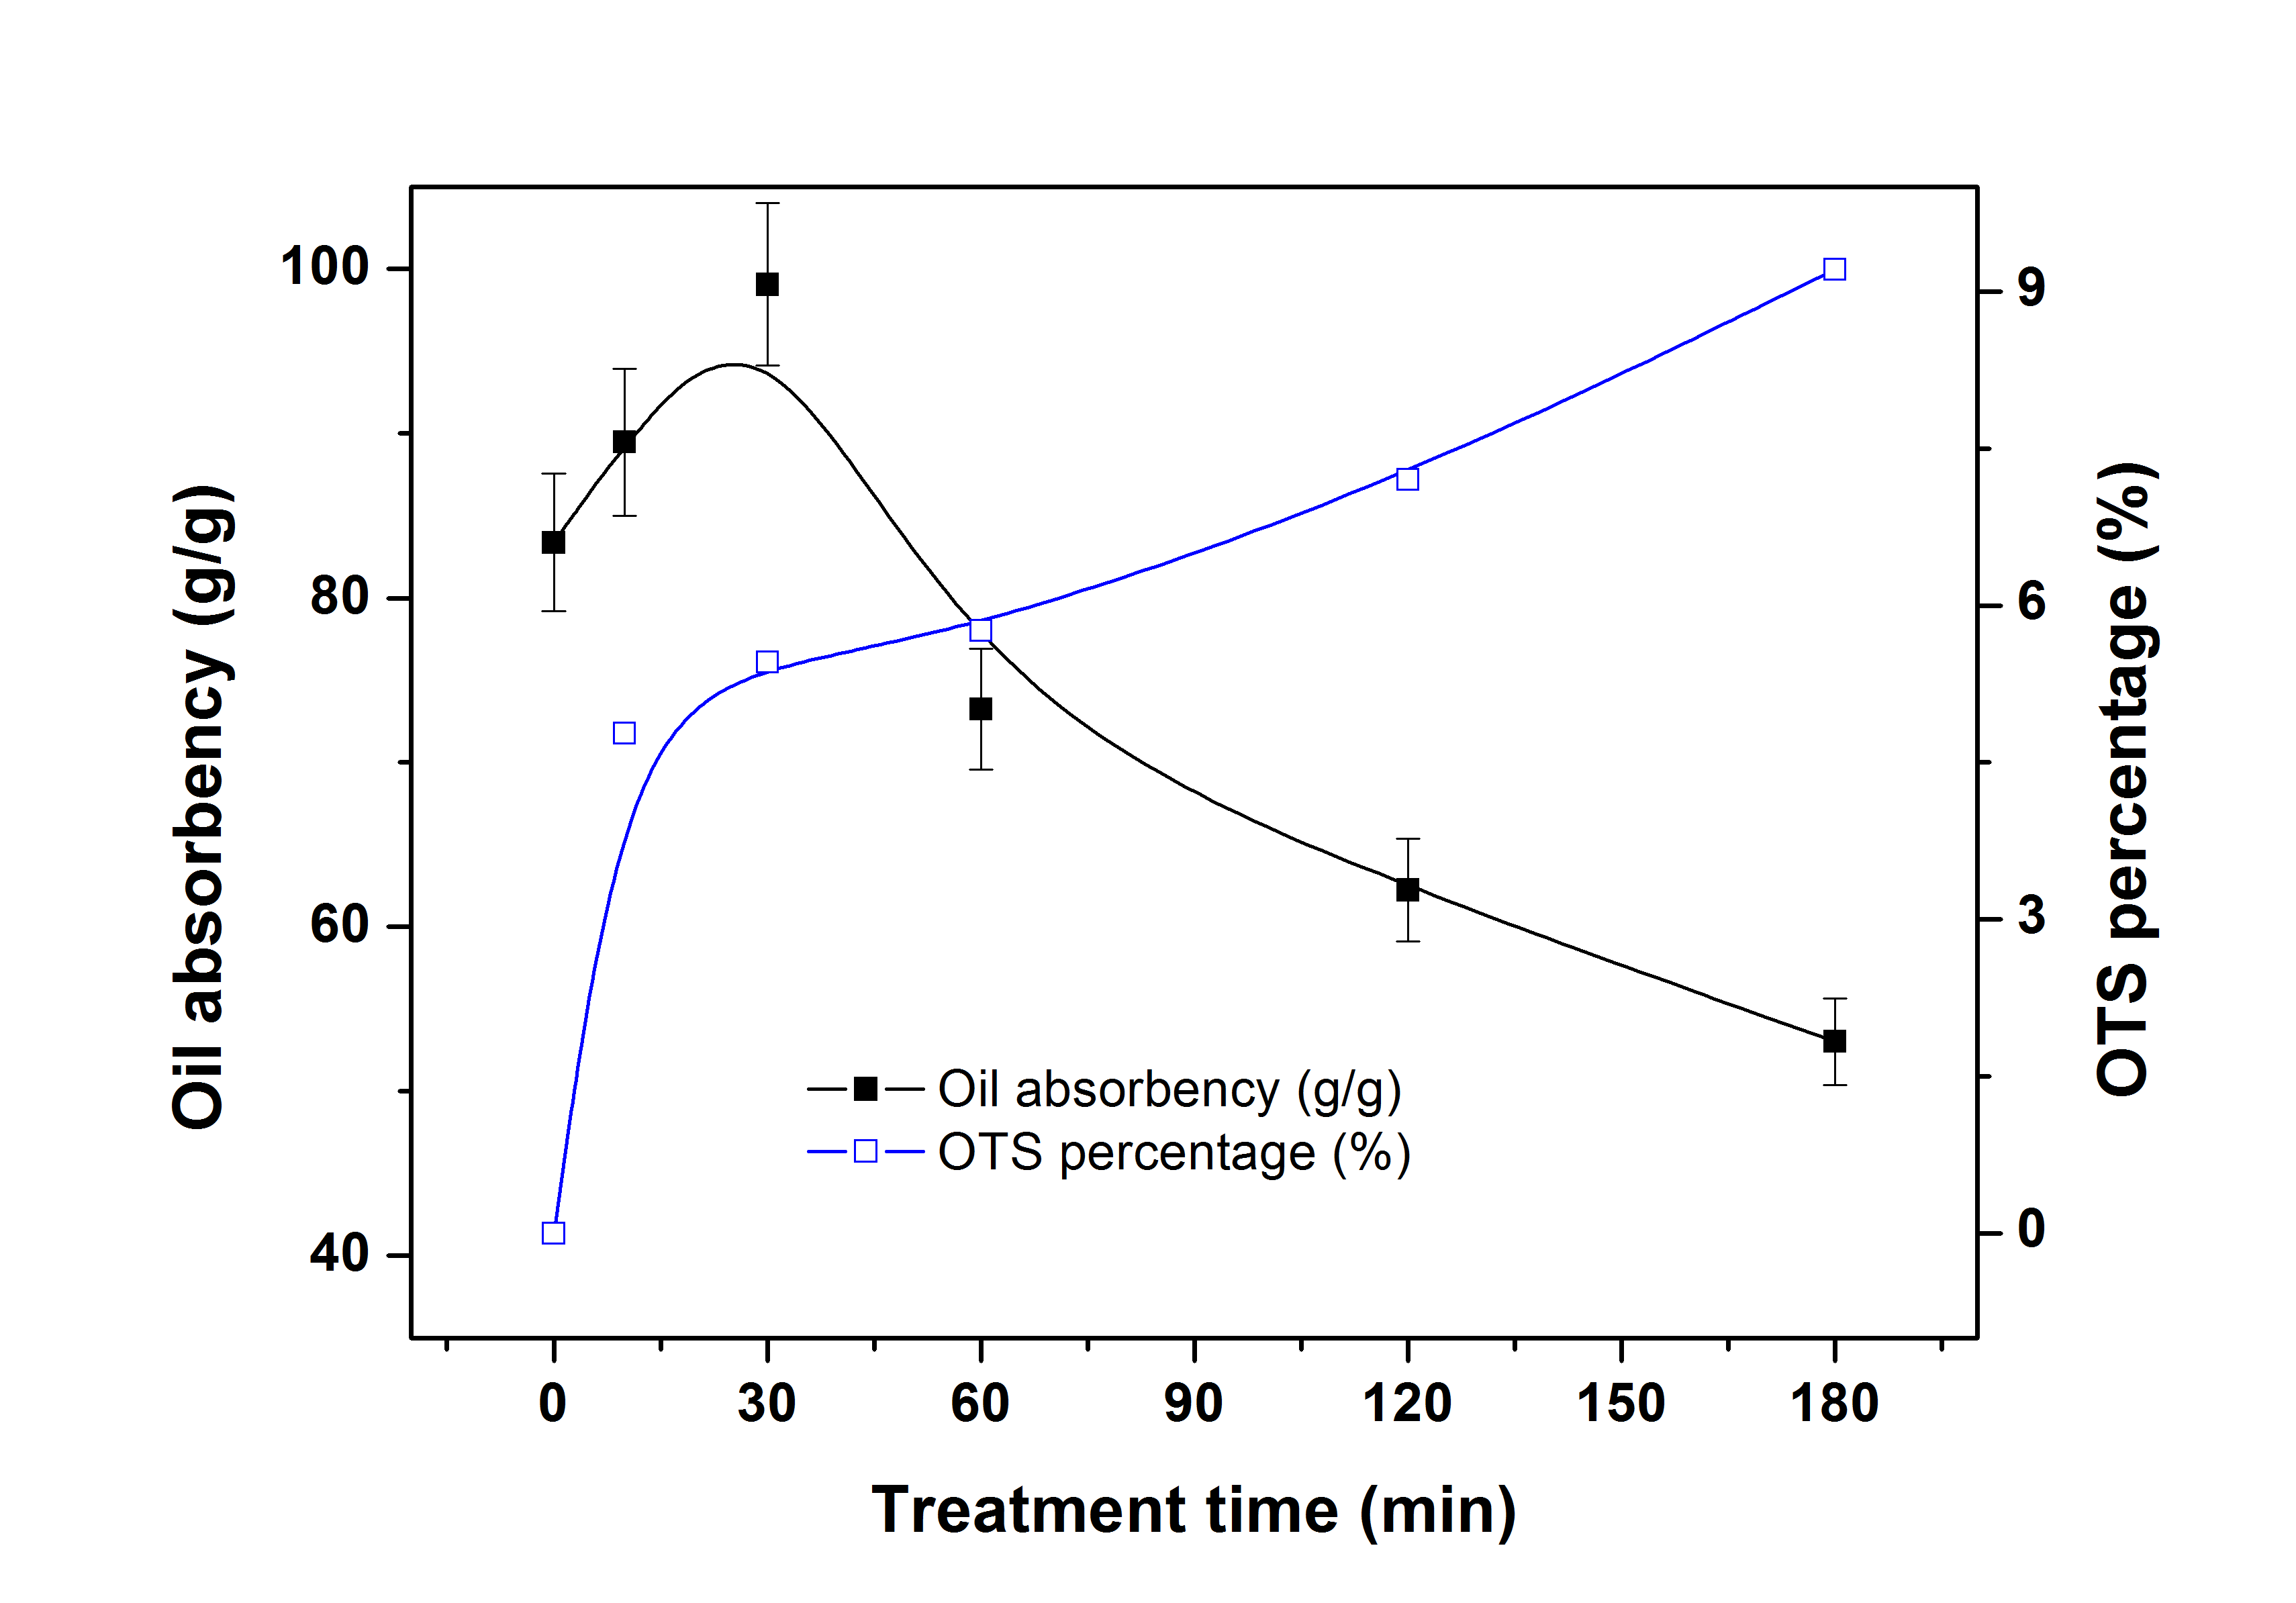


**Fig. S6** Oil absorbency and OTS percentage as a function of treatment time for KF. The engine oil (Mobil 5w-40 SN) was used to test the oil absorbency


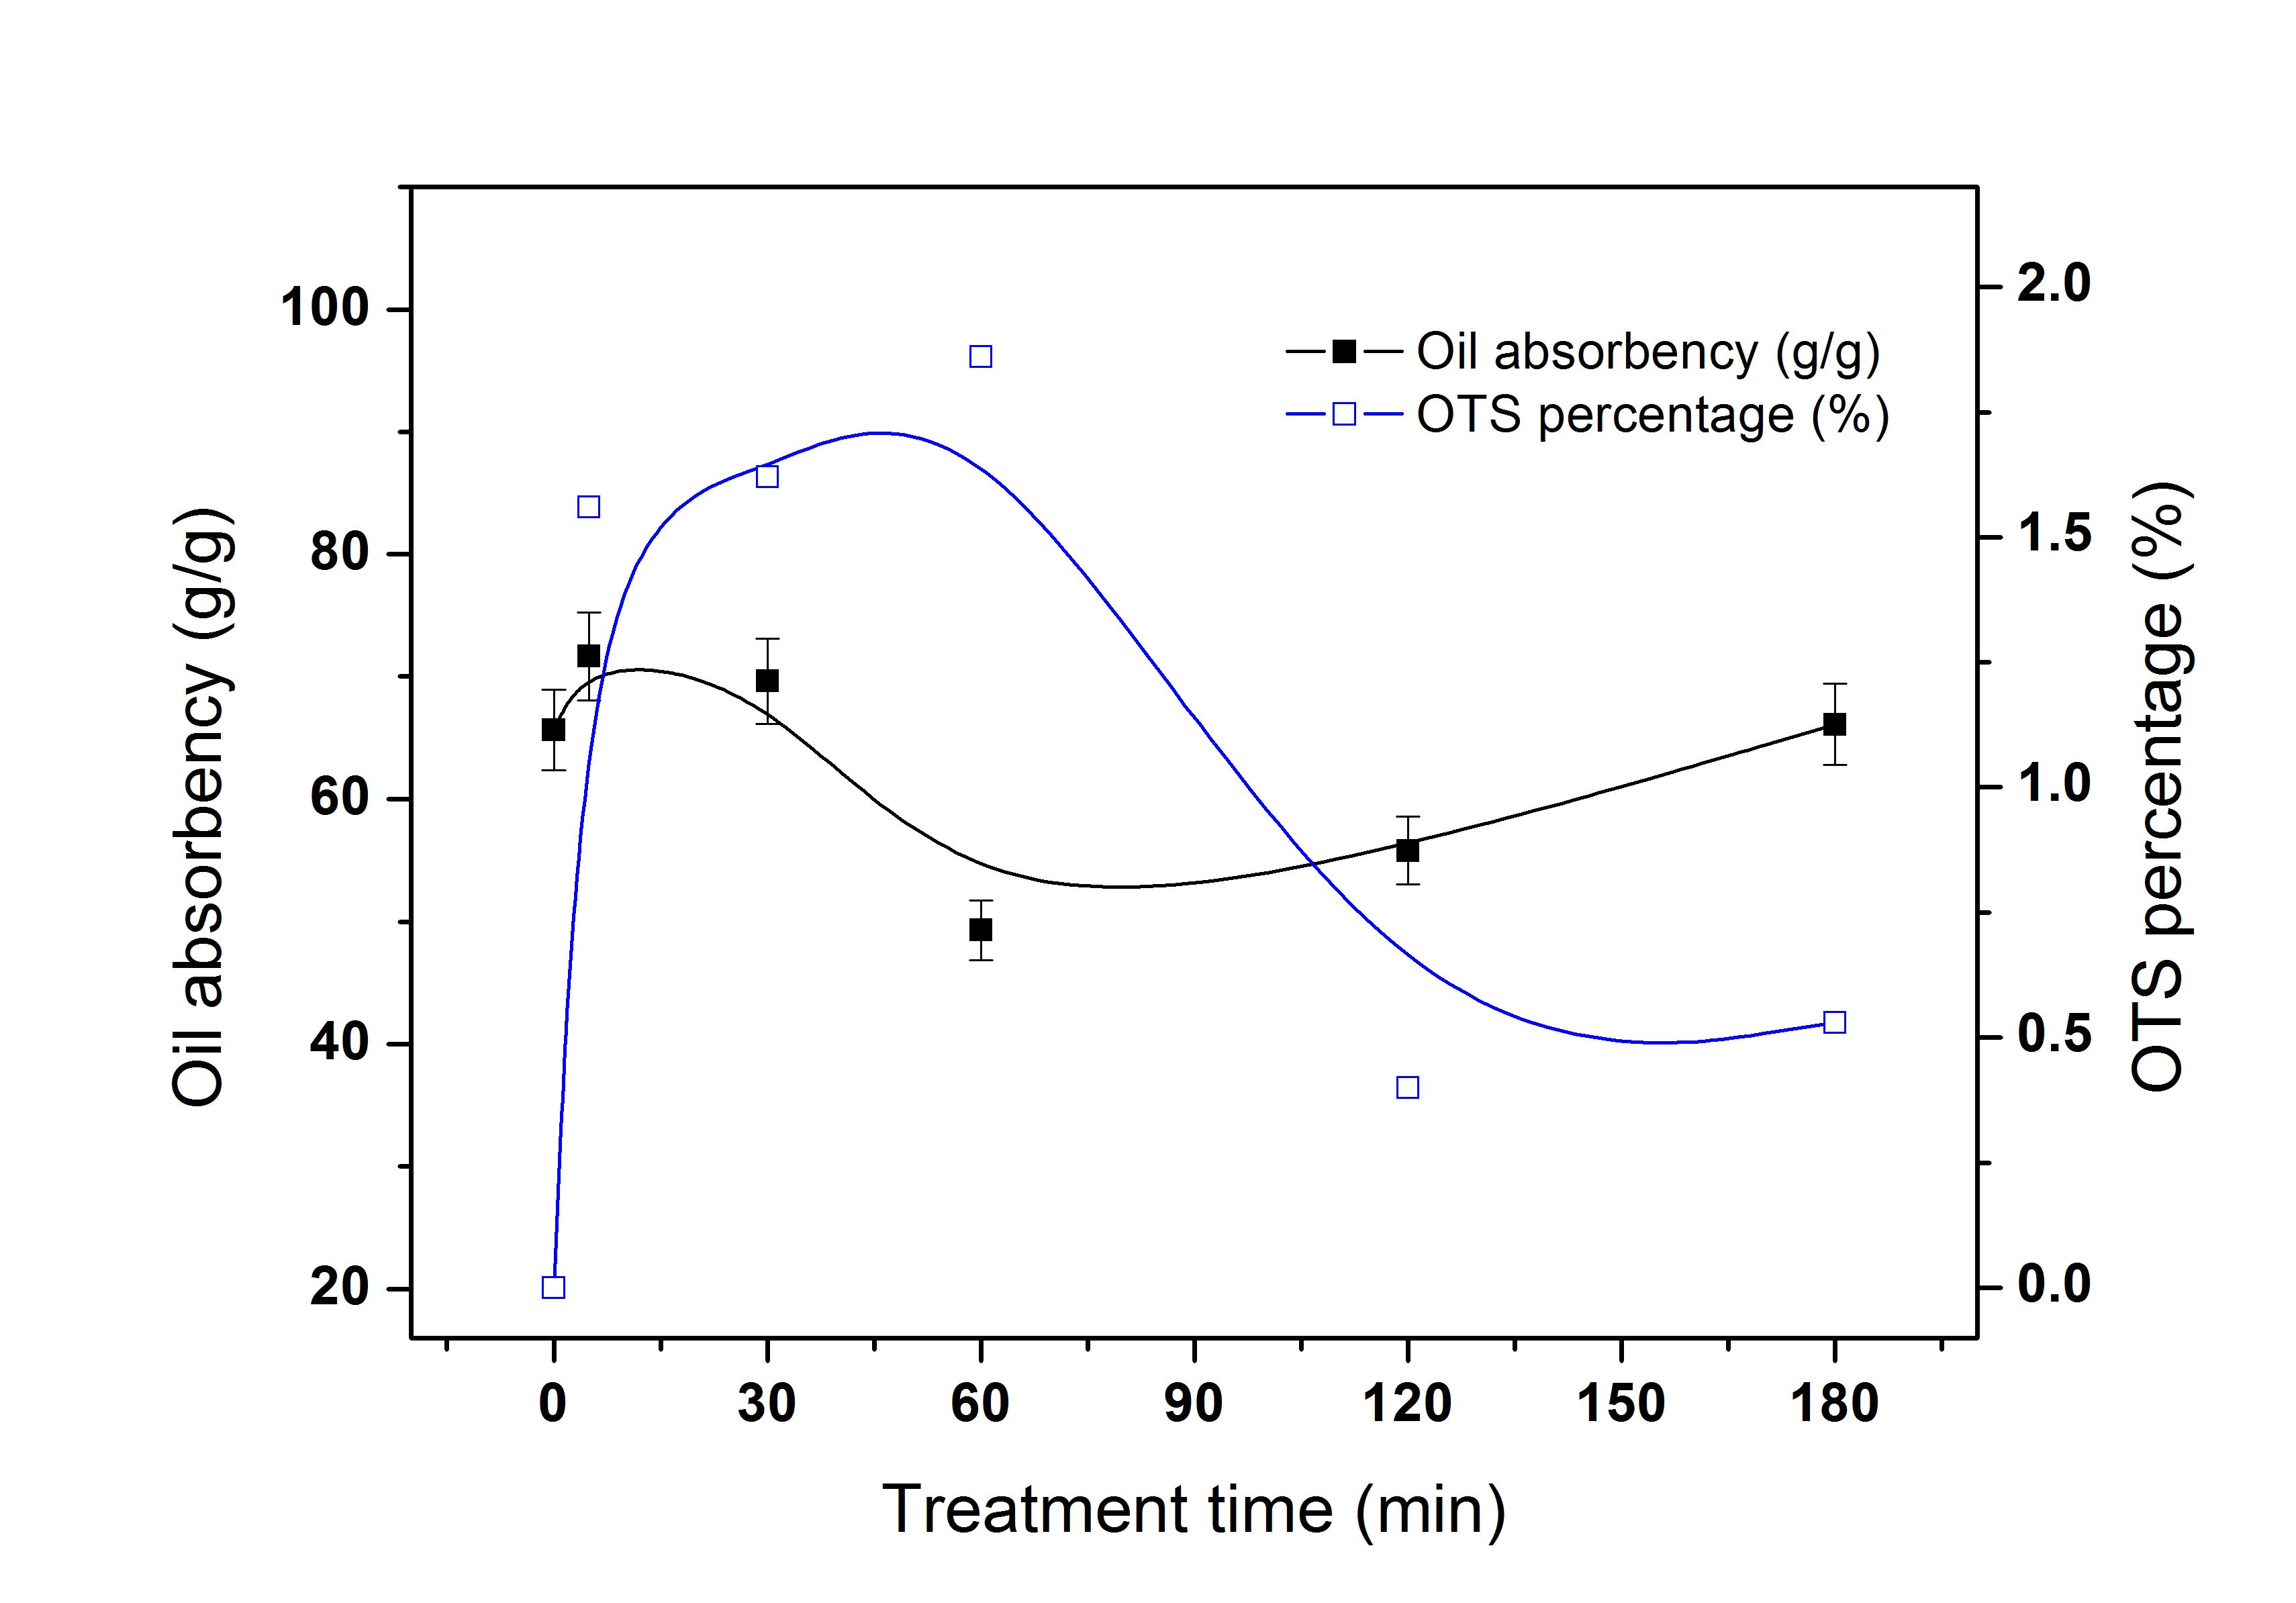


**Fig. S7** Oil absorbency and OTS percentage as a function of treatment time for CGF. The engine oil (Mobil 5w-40 SN) was used to test the oil absorbency


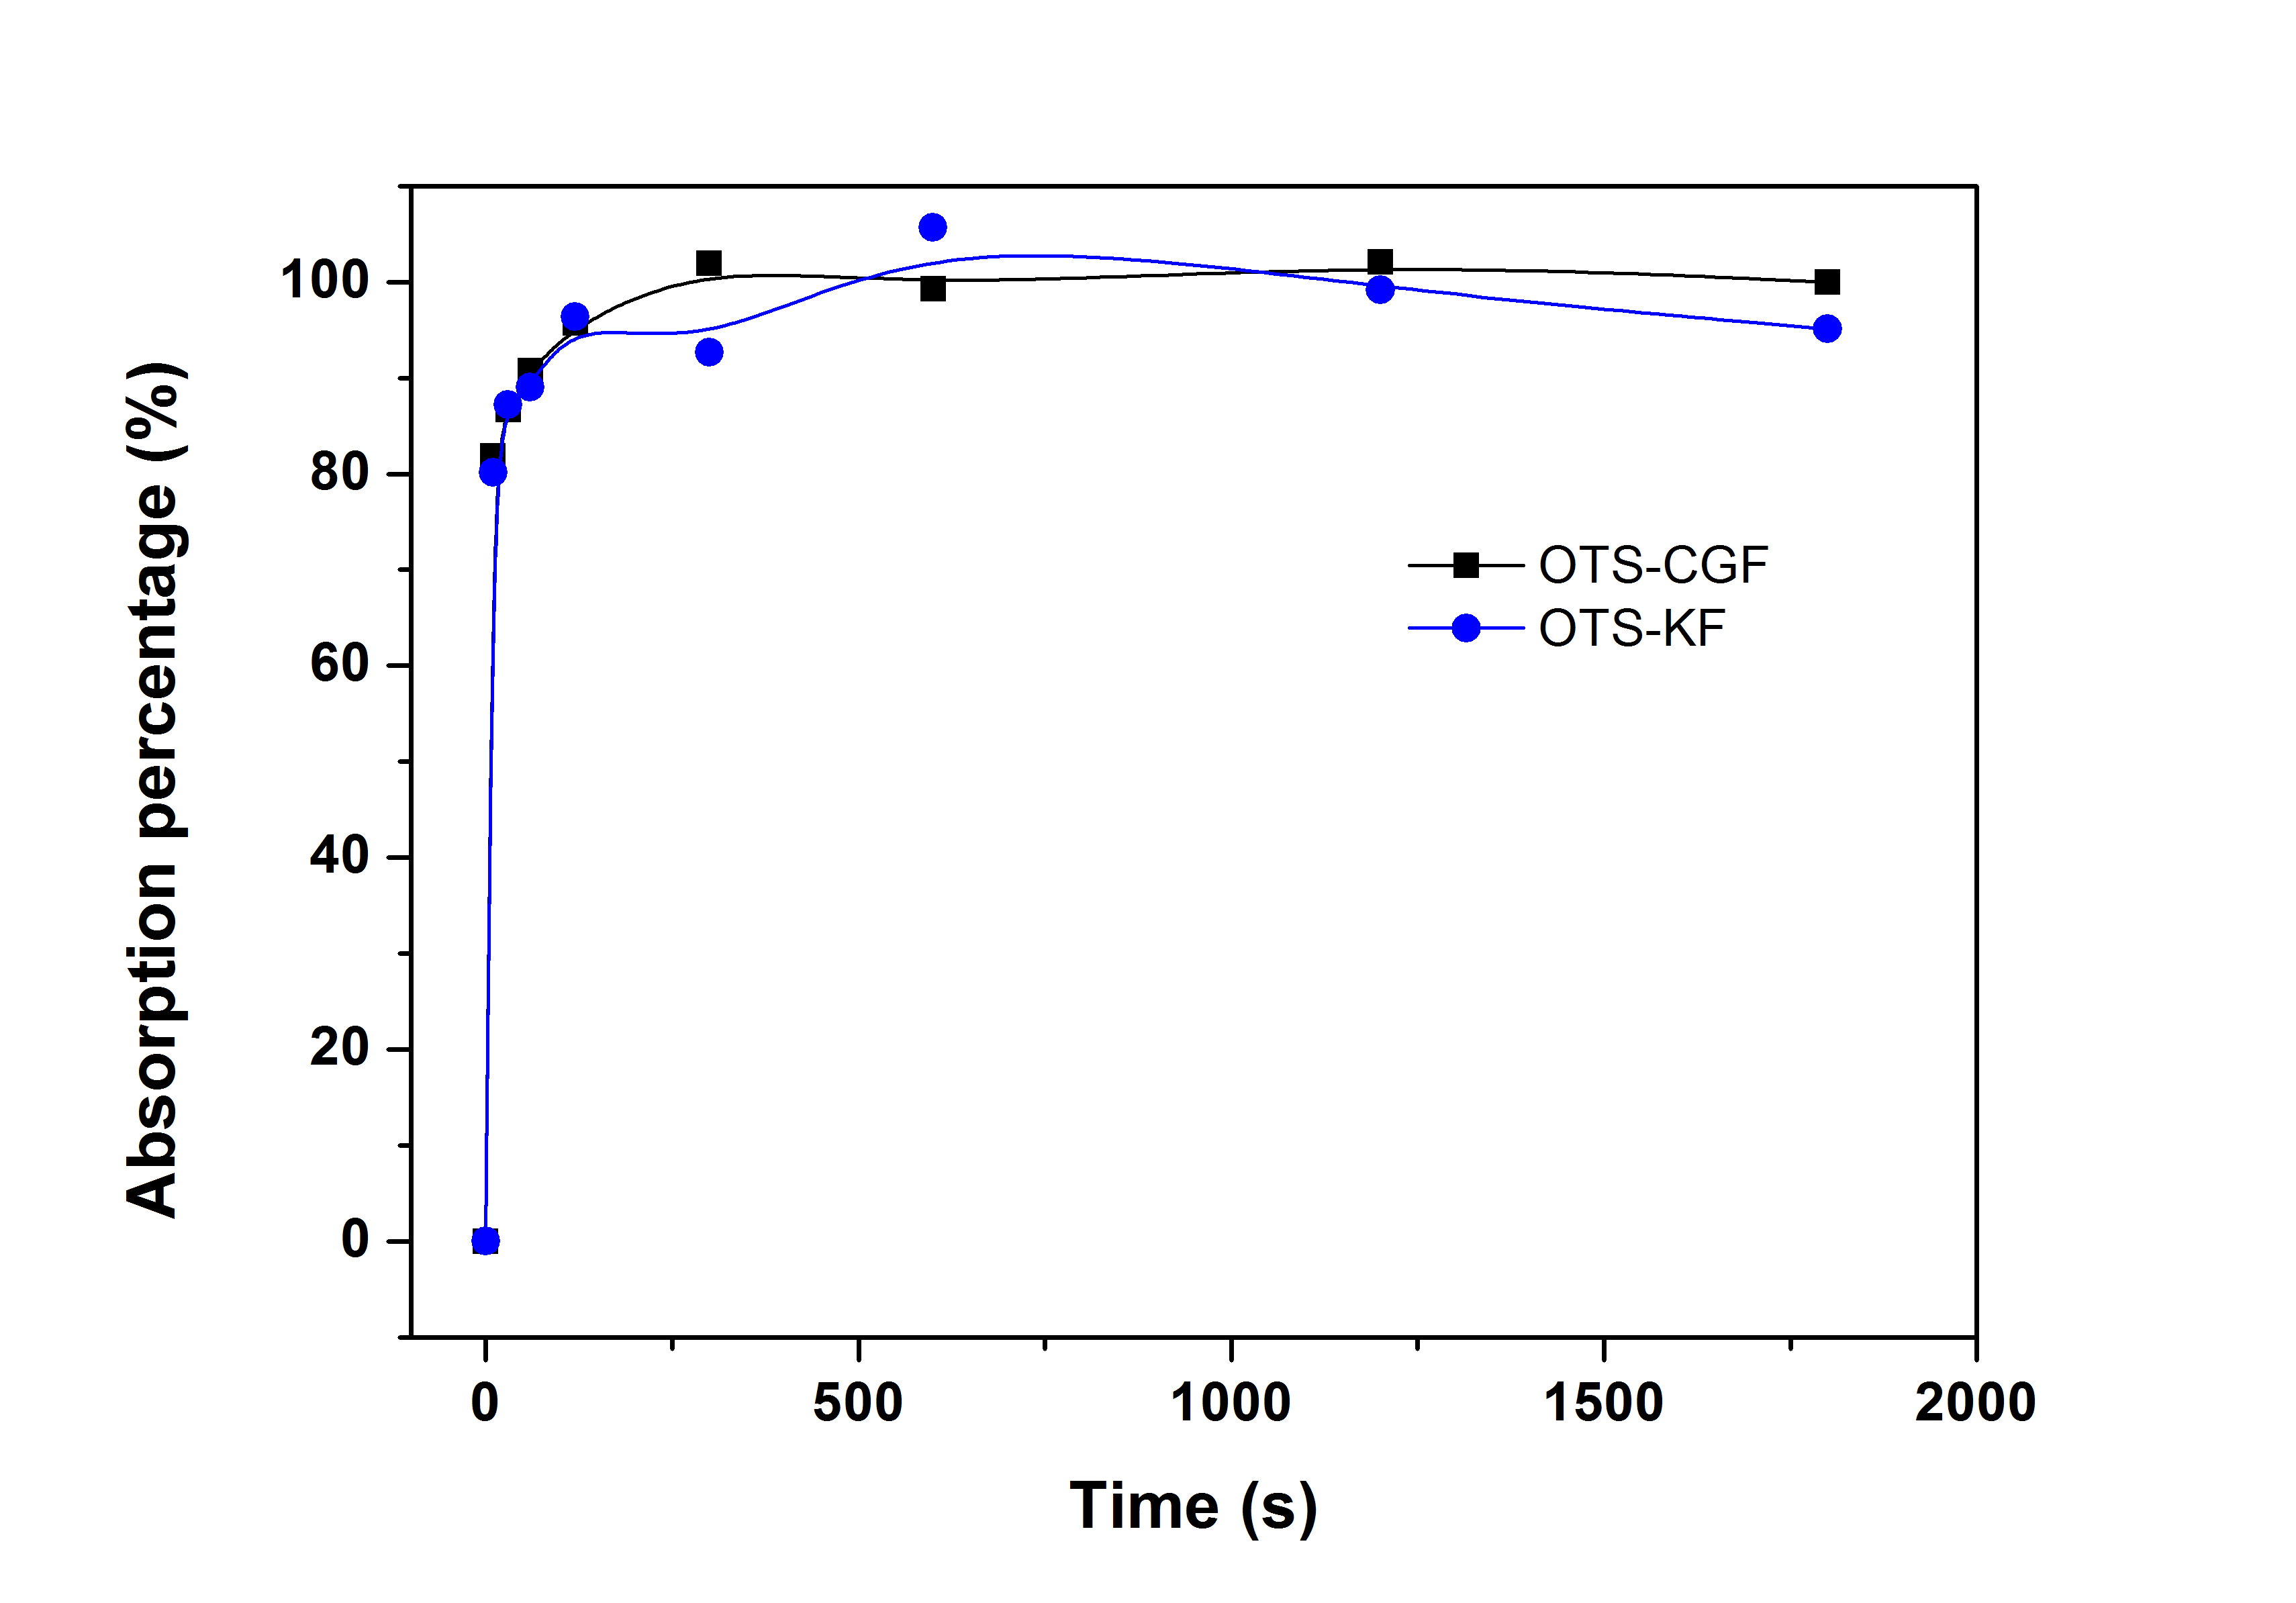


**Fig. S8** Oil-absorbing percentage as a function of time for OTS-CGF and OTS-KF. The soybean oil was used to test the absorption kinetics


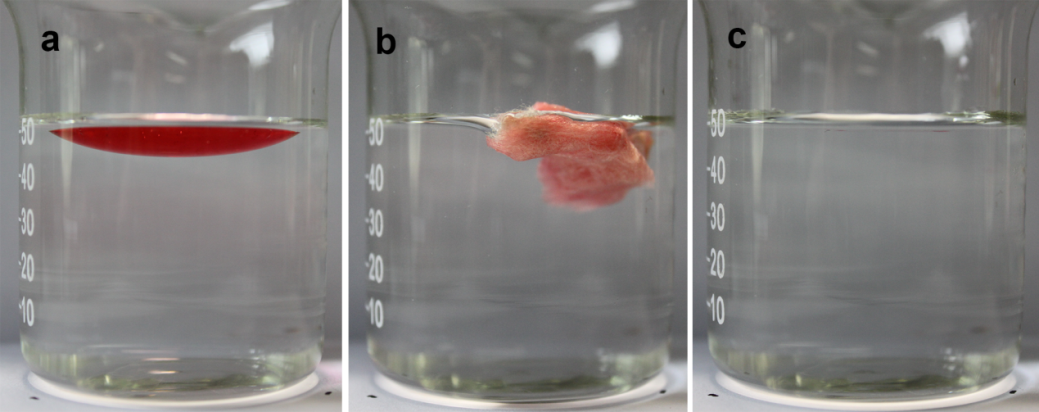


**Fig. S9** Digital photographs for removal of Sudan III dyed-soybean oil from the surface of water. (a) 2 mL red-colored soybean oil was mixed with 50 mL distilled water to form an oil layer, (b) OTS-KF can quickly absorb the red-colored oil layer and then float on the water, and (c) With the removal of OTS-KF from the water, a transparent aqueous solution was observed
